# Supplementary material
Source: PubMed Central journal article supplement (PMC7784705)
Supplement: NIHMS1650498-supplement-Supporting_information.pdf [file NIHMS1650498-supplement-Supporting_information.pdf]

Supporting Information for:

**Temporal shifts in poly- and perfluoroalkyl substances (PFASs) in North Atlantic pilot whales indicate large contribution of atmospheric precursors**

Clifton Dassuncao\*<sup>†‡</sup>, Xindi C. Hu<sup>†‡</sup>, Xianming Zhang<sup>†‡</sup>, Rossana Bossi<sup>§</sup>, Maria Dam<sup>¶</sup>, Bjarni Mikkelsen<sup>⊥</sup>, Elsie M. Sunderland<sup>†‡</sup>

<sup>†</sup>Department of Environmental Health, Harvard T.H. Chan School of Public Health, Harvard University, Boston MA USA 02115

<sup>‡</sup>Harvard John A. Paulson School of Engineering and Applied Sciences, Harvard University, Cambridge MA USA 02138

<sup>§</sup>Department of Environmental Science, Aarhus University, Arctic Research Centre (ARC), Frederiksborgvej 399, PO Box 358, DK-4000 Roskilde, Denmark

<sup>¶</sup>Environment Agency, PO Box 2048, FO-165 Argir, Faroe Islands

<sup>⊥</sup>Museum of Natural History, Tórshavn, Faroe Islands

\*Corresponding author: 29 Oxford Street Rm. 125, Cambridge MA 02138, USA

Phone: 718-308-1011

Fax: 617-495-4551

[cld292@mail.harvard.edu](mailto:cld292@mail.harvard.edu)

This file contains 19 pages, 2 figures, and 10 tables.

## Contents of this File:

| Contents                                                                                                                                                                                                                                                        | Page |
|-----------------------------------------------------------------------------------------------------------------------------------------------------------------------------------------------------------------------------------------------------------------|------|
| Figure S1. <i>Age distribution of juvenile male pilot whales collected as part of this study and from the Faroese Environment Agency<sup>1</sup> between 1987 and 2013.</i>                                                                                     | 3    |
| Table S1. <i>Ancillary data on pilot whales harvested in the Faroe Islands with tissues archived by the Faroese Natural History Museum and analyzed for PFASs in this study.</i>                                                                                | 4    |
| Table S2. <i>Supporting data on pilot whale muscle tissue collected and analyzed by the Faroese Environment Agency.<sup>1</sup></i>                                                                                                                             | 7    |
| Table S3. <i>Analytical parameters for target analytes and isotopically labeled compounds.</i>                                                                                                                                                                  | 8    |
| Table S4. <i>Method recoveries based on duplicate analysis of six calf-liver samples spiked with 1 to 20 ng g<sup>-1</sup> of each PFAS.</i>                                                                                                                    | 9    |
| Table S5. <i>Flux of FOSA derived from the Devon ice cap, Devon Island, Nunavut, Canada<sup>2</sup> and corresponding air concentrations (C<sub>A</sub>).</i>                                                                                                   | 10   |
| Figure S2. <i>Map of satellite telemetry data from three pilot whales tagged off the coast of the Faroe Islands (show in blue) in the summer 2000. Adapted from Bloch et al.<sup>3</sup></i>                                                                    | 11   |
| Table S6. <i>Partitioning model for FOSA in seawater and squid.</i>                                                                                                                                                                                             | 12   |
| Table S7. <i>Bioaccumulation model for pilot whales.</i>                                                                                                                                                                                                        | 13   |
| Table S8. <i>List of bioaccumulation model parameters</i>                                                                                                                                                                                                       | 15   |
| Table S9. <i>Results of temporal regressions for each compound adjusted and unadjusted for length of pilot whale using traditional regression for PFOS and FOSA and maximum likelihood estimation (MLE) for the remaining compounds containing non-detects.</i> | 16   |
| Table S10. <i>Measured concentrations (pg g<sup>-1</sup> wet weight) of FOSA in five European flying squid (<i>Todarodes sagittatus</i>) caught off the coast of the Faroe Islands in 2010.</i>                                                                 | 17   |
| References                                                                                                                                                                                                                                                      | 18   |

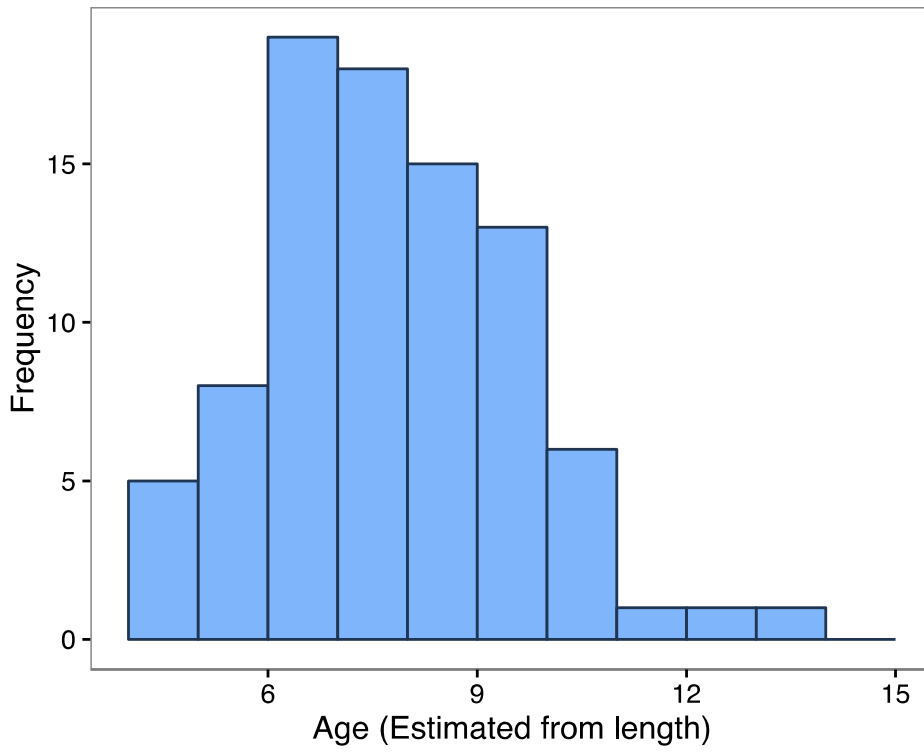

**Figure S1.** Age distribution of juvenile male pilot whales collected as part of this study and from the Faroese Environment Agency<sup>1</sup> between 1987 and 2013.

**Table S1a.** Ancillary data on pilot whales harvested in the Faroe Islands with tissues archived by the Faroese Natural History Museum and analyzed for PFASs in this study.

| Sample ID    | Sampling Date | Gender | Length (cm) | Age Category <sup>a</sup> |
|--------------|---------------|--------|-------------|---------------------------|
| 19940630-01  | 6/30/94       | M      | 445         | Juvenile                  |
| 19940630-02  | 6/30/94       | M      | 435         | Juvenile                  |
| 19960628-03  | 6/28/96       | M      | 385         | Juvenile                  |
| 19960628-04  | 6/28/96       | M      | 407         | Juvenile                  |
| 19960628-05  | 6/28/96       | M      | 380         | Juvenile                  |
| 19981125-06  | 11/25/98      | M      | 395         | Juvenile                  |
| 19981125-07  | 11/25/98      | M      | 370         | Juvenile                  |
| 19990314-08  | 3/14/99       | M      | 400         | Juvenile                  |
| 19990314-09  | 3/14/99       | M      | 400         | Juvenile                  |
| 19990908-010 | 9/8/99        | M      | 430         | Juvenile                  |
| 20000831-011 | 8/31/00       | M      | 390         | Juvenile                  |
| 20000831-012 | 8/31/00       | M      | 435         | Juvenile                  |
| 20000909-013 | 9/9/00        | M      | 415         | Juvenile                  |
| 20060101-014 | 1/1/06        | M      | 470         | Juvenile                  |
| 20060101-015 | 1/1/06        | M      | 430         | Juvenile                  |
| 20060101-016 | 1/1/06        | M      | 366         | Juvenile                  |
| 20060101-017 | 1/1/06        | M      | 450         | Juvenile                  |
| 20060101-018 | 1/1/06        | M      | 455         | Juvenile                  |
| 20060101-019 | 1/1/06        | M      | 458         | Juvenile                  |
| 20060101-020 | 1/1/06        | M      | 411         | Juvenile                  |
| 20110209-021 | 2/9/11        | M      | 369         | Juvenile                  |
| 20110209-022 | 2/9/11        | M      | 437         | Juvenile                  |
| 20110528-023 | 5/28/11       | M      | 423         | Juvenile                  |
| 20110528-024 | 5/28/11       | M      | 459         | Juvenile                  |
| 20110902-025 | 9/2/11        | M      | 414         | Juvenile                  |
| 20110902-026 | 9/2/11        | M      | 450         | Juvenile                  |
| 20111113-027 | 11/13/11      | M      | 433         | Juvenile                  |
| 20111113-028 | 11/13/11      | M      | 343         | Juvenile                  |
| 20111113-029 | 11/13/11      | M      | 436         | Juvenile                  |
| 20111113-030 | 11/13/11      | M      | 453         | Juvenile                  |
| 20111113-031 | 11/13/11      | M      | 338         | Juvenile                  |
| 20111118-032 | 11/18/11      | M      | 415         | Juvenile                  |
| 20111122-033 | 11/22/11      | M      | 446         | Juvenile                  |
| 20111122-034 | 11/22/11      | M      | 508         | Adult                     |
| 20130721-035 | 7/21/13       | M      | 400         | Juvenile                  |
| 20130721-036 | 7/21/13       | M      | 578         | Adult                     |
| 20130721-037 | 7/21/13       | M      | 515         | Adult                     |
| 20130721-038 | 7/21/13       | F      | 424         | Adult                     |

**Table S1b.** Ancillary data on pilot whales harvested in the Faroe Islands with tissues archived by the Faroese Natural History Museum and analyzed for PFASs in this study.

| Sample ID    | Sampling Date | Gender | Length (cm) | Age Category <sup>a</sup> |
|--------------|---------------|--------|-------------|---------------------------|
| 20130721-039 | 7/21/13       | M      | 406         | Juvenile                  |
| 20130721-040 | 7/21/13       | F      | 442         | Adult                     |
| 20130721-041 | 7/21/13       | F      | 320         | Juvenile                  |
| 20130721-042 | 7/21/13       | F      | 324         | Juvenile                  |
| 20130721-043 | 7/21/13       | M      | 376         | Juvenile                  |
| 20130721-044 | 7/21/13       | F      | 424         | Adult                     |
| 20130721-045 | 7/21/13       | M      | 526         | Adult                     |
| 20130721-046 | 7/21/13       | F      | 454         | Adult                     |
| 20130721-047 | 7/21/13       | F      | 431         | Adult                     |
| 20130721-048 | 7/21/13       | F      | 443         | Adult                     |
| 20130721-049 | 7/21/13       | M      | 459         | Juvenile                  |
| 20130721-050 | 7/21/13       | F      | 339         | Juvenile                  |
| 20130721-051 | 7/21/13       | M      | 431         | Juvenile                  |
| 20130730-052 | 7/30/13       | F      | 429         | Adult                     |
| 20130730-053 | 7/30/13       | F      | 431         | Adult                     |
| 20130808-054 | 8/8/13        | M      | 532         | Adult                     |
| 20130808-055 | 8/8/13        | F      | 452         | Adult                     |
| 20130808-056 | 8/8/13        | F      | 408         | Adult                     |
| 20130808-057 | 8/8/13        | M      | 421         | Juvenile                  |
| 20130808-058 | 8/8/13        | M      | 425         | Juvenile                  |
| 20130808-059 | 8/8/13        | F      | 324         | Juvenile                  |
| 20130808-060 | 8/8/13        | M      | 545         | Adult                     |
| 20130808-061 | 8/8/13        | F      | 425         | Adult                     |
| 20130811-062 | 8/11/13       | M      | 440         | Juvenile                  |
| 20130811-063 | 8/11/13       | F      | 338         | Juvenile                  |
| 20130811-064 | 8/11/13       | F      | 309         | Juvenile                  |
| 20130811-065 | 8/11/13       | F      | 438         | Adult                     |
| 20130811-066 | 8/11/13       | M      | 482         | Juvenile                  |
| 20130811-067 | 8/11/13       | F      | 402         | Adult                     |
| 20130811-068 | 8/11/13       | F      | 430         | Adult                     |
| 20130811-069 | 8/11/13       | M      | 564         | Adult                     |
| 20130811-070 | 8/11/13       | M      | 415         | Juvenile                  |
| 20130811-071 | 8/11/13       | M      | 340         | Juvenile                  |
| 20130811-072 | 8/11/13       | M      | 414         | Juvenile                  |
| 20130811-073 | 8/11/13       | F      | 346         | Juvenile                  |
| 20130811-074 | 8/11/13       | M      | 542         | Adult                     |
| 20130814-075 | 8/14/13       | F      | 431         | Adult                     |
| 20130814-076 | 8/14/13       | F      | 298         | Juvenile                  |
| 20130814-077 | 8/14/13       | F      | 443         | Adult                     |

**Table S1c.** Ancillary data on pilot whales harvested in the Faroe Islands with tissues archived by the Faroese Natural History Museum and analyzed for PFASs in this study.

| Sample ID    | Sampling Date | Gender | Length (cm) | Age Category <sup>a</sup> |
|--------------|---------------|--------|-------------|---------------------------|
| 20130814-078 | 8/14/13       | F      | 426         | Adult                     |
| 20130814-079 | 8/14/13       | F      | 434         | Adult                     |
| 20130814-080 | 8/14/13       | M      | 502         | Adult                     |
| 20130814-081 | 8/14/13       | F      | 427         | Adult                     |
| 20130814-082 | 8/14/13       | M      | 430         | Juvenile                  |
| 20130827-083 | 8/27/13       | F      | 454         | Adult                     |
| 20130827-084 | 8/27/13       | M      | 493         | Juvenile                  |
| 20130827-085 | 8/27/13       | M      | 426         | Juvenile                  |
| 20130827-086 | 8/27/13       | M      | 394         | Juvenile                  |
| 20130827-087 | 8/27/13       | F      | 303         | Juvenile                  |

<sup>a</sup>Age was determined by size following Bloch et al.<sup>4</sup> with adults defined by lengths >500 cm for males and >378 cm for females.

**Table S2.** Supporting data on pilot whale muscle tissue collected and analyzed by the Faroese Environment Agency.<sup>1</sup>

| Sample ID     | Sampling Date | Gender | Length (cm) | Age Category <sup>a</sup> |
|---------------|---------------|--------|-------------|---------------------------|
| 19860712-088  | 7/12/86       | M      | 385         | Juvenile                  |
| 19860712-089  | 7/12/86       | M      | 422         | Juvenile                  |
| 19861026-090  | 10/26/86      | M      | 452         | Juvenile                  |
| 19861026-091  | 10/26/86      | M      | 360         | Juvenile                  |
| 19861101-092  | 11/1/86       | M      | 391         | Juvenile                  |
| 19861101-093  | 11/1/86       | M      | 400         | Juvenile                  |
| 19870722-094  | 7/22/87       | M      | 380         | Juvenile                  |
| 19870802-095  | 8/2/87        | M      | 398         | Juvenile                  |
| 19870802-096  | 8/2/87        | M      | 408         | Juvenile                  |
| 19870819-097  | 8/19/87       | M      | 410         | Juvenile                  |
| 19870819-098  | 8/19/87       | M      | 380         | Juvenile                  |
| 19880610-099  | 6/10/88       | M      | 379         | Juvenile                  |
| 19880610-0100 | 6/10/88       | M      | 415         | Juvenile                  |
| 19970826-0101 | 8/26/97       | M      | 390         | Juvenile                  |
| 19970826-0102 | 8/26/97       | M      | 420         | Juvenile                  |
| 19970924-0103 | 9/24/97       | M      | 360         | Juvenile                  |
| 19970924-0104 | 9/24/97       | M      | 430         | Juvenile                  |
| 19971202-0105 | 12/2/97       | M      | 381         | Juvenile                  |
| 19971202-0106 | 12/2/97       | M      | 419         | Juvenile                  |
| 20010627-0107 | 6/27/01       | M      | 440         | Juvenile                  |
| 2001076-0108  | 7/6/01        | M      | 450         | Juvenile                  |
| 2001076-0109  | 7/6/01        | M      | 354         | Juvenile                  |
| 2001076-0110  | 7/6/01        | M      | 418         | Juvenile                  |
| 20020903-0111 | 9/3/02        | M      | 350         | Juvenile                  |
| 20020903-0112 | 9/3/02        | M      | 390         | Juvenile                  |
| 20020903-0113 | 9/3/02        | M      | 440         | Juvenile                  |
| 20060828-0114 | 8/28/06       | M      | 385         | Juvenile                  |
| 20060828-0115 | 8/28/06       | M      | 390         | Juvenile                  |
| 20060828-0116 | 8/28/06       | M      | 430         | Juvenile                  |
| 20070703-0117 | 7/3/07        | M      | 405         | Juvenile                  |
| 20070703-0118 | 7/3/07        | M      | 380         | Juvenile                  |
| 20070713-0119 | 7/13/07       | M      | 370         | Juvenile                  |
| 20090105-0120 | 1/5/09        | M      | 380         | Juvenile                  |
| 20090105-0121 | 1/5/09        | M      | 405         | Juvenile                  |
| 20100624-0122 | 6/24/10       | M      | 370         | Juvenile                  |
| 20100624-0123 | 6/24/10       | M      | 416         | Juvenile                  |
| 20100702-0124 | 7/2/10        | M      | 387         | Juvenile                  |
| 20100702-0125 | 7/2/10        | M      | 440         | Juvenile                  |

**Table S3.** Analytical parameters for target analytes and isotopically labeled compounds.

| Analytes                                         | Precursor ion<br>( <i>m/z</i> ) | Product ions ( <i>m/z</i> ) | Collision energy (V) |
|--------------------------------------------------|---------------------------------|-----------------------------|----------------------|
| PFBS                                             | 299                             | 80                          | -56                  |
|                                                  |                                 | 99                          | -38                  |
| PFH <sub>x</sub> S                               | 399                             | 99                          | -50                  |
|                                                  |                                 | 80                          | -80                  |
| <sup>13</sup> C <sub>4</sub> -PFH <sub>x</sub> S | 403                             | 103                         | -80                  |
| PFH <sub>x</sub> A                               | 313                             | 269                         | -12                  |
|                                                  |                                 | 119                         | -30                  |
| <sup>13</sup> C <sub>4</sub> -PFH <sub>x</sub> A | 315                             | 270                         | -12                  |
| PFHpA                                            | 363                             | 169                         | -26                  |
|                                                  |                                 | 319                         | -16                  |
| PFOS                                             | 499                             | 80                          | -104                 |
|                                                  |                                 | 99                          | -100                 |
| <sup>13</sup> C <sub>4</sub> -PFOS               | 503                             | 99                          | -100                 |
| PFOSA                                            | 498                             | 169                         | -50                  |
|                                                  |                                 | 78                          | -62                  |
| <sup>13</sup> C <sub>8</sub> -PFOSA              | 506                             | 78                          | -62                  |
| PFNA                                             | 463                             | 419                         | -22                  |
| <sup>13</sup> C <sub>5</sub> -PFNA               | 468                             | 423                         | -22                  |
| PFOA                                             | 413                             | 369                         | -20                  |
|                                                  |                                 | 169                         | -22                  |
| <sup>13</sup> C <sub>4</sub> -PFOA               | 417                             | 372                         | -20                  |
| PFHpS                                            | 449                             | 80                          | -92                  |
|                                                  |                                 | 99                          | -84                  |
| PFDS                                             | 599                             | 99                          | -104                 |
|                                                  |                                 | 80                          | -104                 |
| PFDA                                             | 513                             | 219                         | -30                  |
|                                                  |                                 | 469                         | -22                  |
| <sup>13</sup> C <sub>2</sub> -PFDA               | 515                             | 470                         | -20                  |
| PFUnA                                            | 563                             | 519                         | -22                  |
|                                                  |                                 | 169                         | -44                  |
| <sup>13</sup> C <sub>2</sub> -PFUnA              | 565                             | 520                         | -22                  |
| PFDoA                                            | 613                             | 569                         | -18                  |
|                                                  |                                 | 169                         | -34                  |
| <sup>13</sup> C <sub>2</sub> -PFDoA              | 615                             | 570                         | -34                  |
| PFTrA                                            | 663                             | 619                         | -28                  |
|                                                  |                                 | 169                         | -38                  |
| PFTeA                                            | 713                             | 669                         | -24                  |
|                                                  |                                 | 169                         | -38                  |



**Table S4.** Method recoveries based on duplicate analysis of six calf-liver samples spiked with 1 to 20 ng g<sup>-1</sup> of each PFAS.

| Compound | Average Recovery % | Standard Deviation | RSD%  |
|----------|--------------------|--------------------|-------|
| PFBS     | 74.7               | 5.29               | 7.08  |
| PFHxS    | 97.3               | 6.20               | 6.37  |
| PFHpS    | 126                | 15.1               | 12.0  |
| PFOS     | 102                | 7.10               | 6.97  |
| PFDS     | 81.2               | 19.4               | 23.9  |
| FOSA     | 104                | 8.44               | 8.11  |
| PFHxA    | 104                | 5.74               | 5.52  |
| PFHpA    | 129                | 8.16               | 6.35  |
| PFOA     | 102                | 6.01               | 5.88  |
| PFNA     | 104                | 6.58               | 6.34  |
| PFDA     | 101                | 5.40               | 5.35  |
| PFUnA    | 99.7               | 5.27               | 5.29  |
| PFDoA    | 103                | 6.10               | 5.92  |
| PFTTrA   | 84.4               | 37.5               | 44.4* |
| PFTeA    | 79.4               | 36.9               | 46.5* |

\*RSDs for PFTeA and PFTTrA were higher (44%-47%) because of the tendency of longer-chained PFASs to sorb to surfaces during sample preparation and analysis. Such variability will bias trend analysis toward non-significant findings.<sup>5</sup> So, we include these compounds in all statistical analysis but results may underestimate potential changes.

**Table S5.** Flux of FOSA derived from the Devon ice cap, Devon Island, Nunavut, Canada<sup>2</sup> and corresponding air concentrations ( $C_A$ ).

| Year | Flux ( $\text{ng m}^{-2} \text{yr}^{-1}$ ) | Back-calculated $C_A$ ( $\text{pg m}^{-3}$ ) |
|------|--------------------------------------------|----------------------------------------------|
| 2007 | 2.07                                       | 2.4                                          |
| 2006 | 2.19                                       | 2.5                                          |
| 2005 | 3.09                                       | 3.6                                          |
| 2004 | 1.42                                       | 1.6                                          |
| 2003 | 2.45                                       | 2.8                                          |
| 2002 | 5.99                                       | 6.9                                          |
| 2001 | 15.74                                      | 18.2                                         |
| 2000 | 13.27                                      | 15.4                                         |
| 1999 | 14.37                                      | 16.7                                         |
| 1998 | 13.94                                      | 16.2                                         |
| 1997 | 18.86                                      | 21.9                                         |
| 1996 | 8.06                                       | 9.3                                          |
| 1995 | 1.51                                       | 1.8                                          |
| 1994 | 2.45                                       | 2.8                                          |
| 1993 | 3.19                                       | 3.7                                          |

<sup>a</sup> We used mean atmospheric FOSA concentrations from three cruise transects (North Sea:  $2.66 \text{ pg m}^{-3}$ ; Canary Islands to Nfld., Canada:  $2.03 \text{ pg m}^{-3}$ ; Norwegian Sea:  $2.48 \text{ pg m}^{-3}$ ) to estimate atmospheric concentrations between August 2007 and January 2008 ( $2.39 \text{ pg m}^{-3}$ ). We use this average atmospheric value and the measurements from ice core data in 2007 of  $2.07 \text{ ng m}^{-2}$  to calculate:  $C_{Air} = \alpha \cdot F$ , where:  $\alpha = 1.15$ . For modelled values between 2007 and 2020 (Figure 5A), we assumed concentrations linearly declined to the minimum value of  $1.6 \text{ pg m}^{-3}$  in 2004, which is similar to average observations from remote high-mountain top in Zurich<sup>6</sup> in 2010 of  $1.7 \text{ pg m}^{-3}$ .

**Figure S2.** Map of satellite telemetry data from three pilot whales tagged off the coast of the Faroe Islands (show in blue) in the summer 2000. Adapted from Bloch et al.<sup>3</sup>

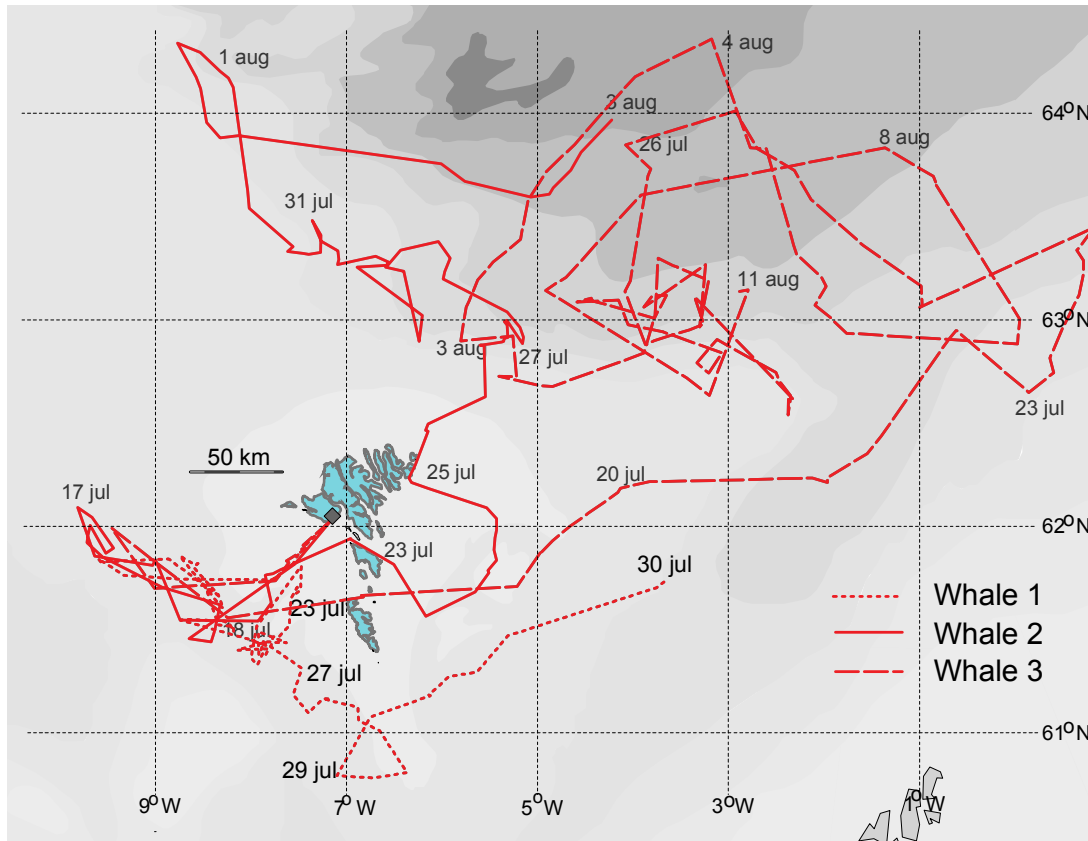

**Table S6.** Partitioning model for FOSA in seawater and squid.

| Parameter             | Description                                           | Equation/Value                               | Reference                       |
|-----------------------|-------------------------------------------------------|----------------------------------------------|---------------------------------|
| <i>Seawater</i>       |                                                       |                                              |                                 |
| $C_W$                 | Seawater FOSA (pg L <sup>-1</sup> ),                  | $C_A K_{AW}$                                 |                                 |
| $C_A$                 | FOSA in air (pg m <sup>-3</sup> )                     | Table S5                                     |                                 |
| $K_{AW}$ <sup>a</sup> | Air-water partitioning coefficient<br>(unitless)      | -3.6                                         | Vierke et al. <sup>7</sup>      |
| <i>Squid</i>          |                                                       |                                              |                                 |
| $C_S$                 | FOSA in Squid (pg g <sup>-1</sup> wet weight)         | $v_{LD}K_{OW} + v_{ND}\beta K_{OW} + v_{WD}$ |                                 |
| $v_{LD}$              | Lipid fraction (unitless)                             | 0.014                                        | Bloch et al. <sup>4</sup>       |
| $v_{ND}$              | Non-lipid organic matter (NLOM)<br>content (unitless) | 0.16                                         | Bloch et al. <sup>4</sup>       |
| $v_{WD}$              | Moisture content (unitless)                           | $1 - v_{ND} - v_{LD}$                        |                                 |
| $\log K_{OW}$         | Octanol-water partition coefficient<br>(unitless)     | 5.8                                          | U.S. EPA <sup>8</sup>           |
| $\beta$               | Sorptive capacity of NLOM relative to<br>octanol      | 0.035                                        | Arnot and<br>Gobas <sup>9</sup> |

<sup>a</sup>  $K_{AW}$  for FOSA from an experimental study<sup>7</sup> assuming a pKa value of 6.24.

**Table S7a.** Bioaccumulation model for pilot whales.

| Parameter          | Description                              | Equation                                                                           | Reference                          |
|--------------------|------------------------------------------|------------------------------------------------------------------------------------|------------------------------------|
| $\frac{dM_B}{dt}$  | Change in mass of FOSA over time         | $W_B \cdot (k_A C_A + k_D \sum (P_i C_{D,i})) - (k_O + k_E + k_U + k_M) \cdot M_B$ |                                    |
| <i>Growth</i>      |                                          |                                                                                    |                                    |
| $W_B$              | Weight of pilot whale (kg)               | $189.68e^{\frac{0.2802}{0.120}(1-e^{-0.12t})}$                                     | Bloch et al. <sup>4</sup>          |
| $L$                | Length of whale (cm)                     | $228.92e^{0.1209/0.13(1-e^{-0.13t})}$                                              | Bloch et al. <sup>4</sup>          |
| <i>Respiration</i> |                                          |                                                                                    |                                    |
| $k_A$              | Rate constant for inhalation (L/kg/day)  | $\frac{E_A G_A}{W_B}$                                                              |                                    |
| $G_A$              | Inhalation rate (L/day)                  | $f V_T$                                                                            |                                    |
| $f$                | Breaths/day                              | $33 W_B^{-0.42}$                                                                   | Limoges et al. <sup>10</sup>       |
| $V_T$              | L                                        | $0.074 W_B^{0.9}$                                                                  | Lafortuna and Jahoda <sup>11</sup> |
| $k_O$              | Rate constant for exhalation (1/day)     | $\frac{k_A}{K_{BA}}$                                                               |                                    |
| $K_{BA}$           | Whale-Air partition coefficient (L/kg)   | $(v_{LB}/\rho_L + v_{NB}\beta/\rho_{NLOM})K_{OA} + \frac{v_{WB}}{K_{AW}\rho_w}$    |                                    |
| $K_{OA}$           | Octanol-air partition coefficient (L/kg) | $\frac{K_{OW}}{K_{AW}}$                                                            |                                    |

**Table S7b.** Bioaccumulation model for pilot whales cont'd.

| <i>Ingestion</i> |                                          |                                                                                                                     |                               |
|------------------|------------------------------------------|---------------------------------------------------------------------------------------------------------------------|-------------------------------|
| $k_D$            | Rate constant for ingestion (1/day)      | $\frac{E_D G_D}{W_B}$                                                                                               |                               |
| $G_D$            | Ingestion Rate (kg/day)                  | $G_D = 0.123 W_B^{0.8}$                                                                                             | Innes et al. <sup>12</sup>    |
| $E_D$            | Assimilation efficiency (%)              | $(10^{-9} K_{OW} + 1.025)^{-1}$                                                                                     | Gobas and Arnot <sup>13</sup> |
| $k_E$            | Rate constant for fecal egestion (1/day) | $\frac{E_D G_F K_{GB}}{W_B}$                                                                                        |                               |
| $G_F$            | Fecal egestion rate (kg/day)             | $\{(1 - \varepsilon_L)v_{LD} + (1 - \varepsilon_N)v_{ND} + (1 - \varepsilon_W)v_{WD}\}G_D$                          |                               |
| $K_{GB}$         | Gut-whale partition coefficient          | $(v_{LG}K_{OW} + v_{NG}K_{OW}\beta + v_{WG})/K_{BW}$                                                                |                               |
| $v_{LG}$         | Lipid fraction in gut                    | $(1 - \varepsilon_L)v_{LD} / \{(1 - \varepsilon_L)v_{LD} + (1 - \varepsilon_N)v_{ND} + (1 - \varepsilon_W)v_{WD}\}$ |                               |
| $v_{NG}$         | NLOM fraction in gut                     | $(1 - \varepsilon_N)v_{ND} / \{(1 - \varepsilon_L)v_{LD} + (1 - \varepsilon_N)v_{ND} + (1 - \varepsilon_W)v_{WD}\}$ |                               |
| $v_{WG}$         | Water fraction in gut                    | $(1 - \varepsilon_W)v_{WD} / \{(1 - \varepsilon_L)v_{LD} + (1 - \varepsilon_N)v_{ND} + (1 - \varepsilon_W)v_{WD}\}$ |                               |
| $K_{BW}$         | Whale-water partition coefficient        | $(v_{LB} + v_{NB}\beta)K_{OW} + v_{WB}$                                                                             |                               |
| <i>Urination</i> |                                          |                                                                                                                     |                               |
| $k_U$            | Rate constant for urination (1/day)      | $\frac{G_U}{W_B K_{BU}}$                                                                                            |                               |
| $K_{BU}$         | Whale-urine partition coefficient        | $(v_{LB}/\rho_L + v_{NB}\beta/\rho_{NLOM})K_{OW} + v_{WB}/\rho_W$                                                   |                               |

**Table S8.** List of bioaccumulation model parameters

| Parameter                     | Description                                                         | Value                                      | Reference                                           |
|-------------------------------|---------------------------------------------------------------------|--------------------------------------------|-----------------------------------------------------|
| <i>Partition Coefficients</i> |                                                                     |                                            |                                                     |
| $\log K_{OW}$                 | Octanol-water partition coefficient<br>(unitless)                   | 5.8                                        | U.S. EPA <sup>8</sup>                               |
| $\log K_{AW}$                 | Air-water partition coefficient<br>(unitless)                       | -3.7                                       | Vierke et al. <sup>7a</sup>                         |
| <i>Squid</i>                  |                                                                     |                                            |                                                     |
| $v_{LD}$                      | Lipid fraction (unitless)                                           | 0.14                                       | Bloch et al. <sup>4</sup>                           |
| $v_{ND}$                      | Non-lipid organic matter (NLOM)<br>content (unitless)               | 0.16                                       | Bloch et al. <sup>4</sup>                           |
| $v_{WD}$                      | Moisture content (unitless)                                         | 0.826                                      |                                                     |
| <i>Pilot Whale</i>            |                                                                     |                                            |                                                     |
| $v_{LB}$                      | Lipid fraction in whale (unitless)                                  | 0.21                                       | Innes et al. <sup>12</sup>                          |
| $v_{NB}$                      | NLOM fraction in whale (unitless)                                   | 0.373                                      | Innes et al. <sup>12</sup>                          |
| $v_{WB}$                      | Water fraction in whale (unitless)                                  | 0.417                                      |                                                     |
| $\beta$                       | Relative sorption capacity of NLOM<br>to that of octanol (unitless) | 0.035                                      | Arnot and Gobas <sup>9</sup>                        |
| $E_A$                         | Uptake efficiency in lungs (unitless)                               | 1                                          | Vestergren <sup>14</sup> ;<br>Gebbink <sup>15</sup> |
| $f$                           | Breathing rate frequency<br>(Breaths/day)                           | $33 \times W_B(t)^{-0.42}$                 | Mortola and<br>Limoges <sup>10</sup>                |
| $V_T$                         | Volume of breath (L)                                                | $0.074 \times W_B(t)^{0.9}$                | Lafortuna and<br>Jahoda <sup>11</sup>               |
| $E_D$                         | Uptake efficiency in GIT (unitless)                                 | $(A_{ED}K_{OW} + B_{ED})^{-1}$             | Gobas and Arnot <sup>13</sup>                       |
| $A_{ED}$                      | Constant for $E_D$ eq. (unitless)                                   | $1.0 \times 10^{-9}$                       | Gobas and Arnot <sup>13</sup>                       |
| $B_{ED}$                      | Constant for $E_D$ eq. (unitless)                                   | 1.025                                      | Gobas and Arnot <sup>13</sup>                       |
| $\varepsilon_L$               | Lipid assimilation efficiency (unitless)                            | 0.9                                        | Gobas and Arnot <sup>13</sup>                       |
| $\varepsilon_N$               | NLOM assimilation efficiency<br>(unitless)                          | 0.5                                        | Gobas and Arnot <sup>13</sup>                       |
| $\varepsilon_W$               | Water assimilation efficiency<br>(unitless)                         | 0.55                                       | Gobas and Arnot <sup>13</sup>                       |
| $G_U$                         | Urinary excretion rate (L/day)                                      | 300 at full size.<br>Proportional to $W_B$ | Binnington et al. <sup>16</sup>                     |

<sup>a</sup>Measured value at a waste-water treatment plant assuming pKa = 6.24.

**Table S9.** Results of temporal regressions for each compound adjusted and unadjusted for length of pilot whale using traditional regression for PFOS and FOSA and maximum likelihood estimation (MLE) for the remaining compounds containing non-detects. PFBS, PFHpS, PFDS, and PFHpA were infrequently detected and so were excluded from analysis.

| Compound         | Unadjusted Model          |         | Adjusted Model |         |                            |         |
|------------------|---------------------------|---------|----------------|---------|----------------------------|---------|
|                  | Slope (yr <sup>-1</sup> ) | p-value | Slope          | p-value | Length (cm <sup>-1</sup> ) | p-value |
| PFBS             | -                         | -       | -              | -       | -                          | -       |
| PFHxS            | -0.54                     | 0.89    | -0.87          | 0.82    | -0.2%                      | 0.49    |
| PFHpS            | -                         | -       | -              | -       | -                          | -       |
| PFOS             | 2.8%                      | <0.0001 | 3.0%           | <0.0001 | -0.3%                      | 0.03    |
| PFDS             | -                         | -       | -              | -       | -                          | -       |
| FOSA             | 7.4%                      | 0.04    | 7.4%           | 0.06    | 0.3%                       | 0.97    |
| (Before<br>2003) |                           |         |                |         |                            |         |
| FOSA             | -13.0%                    | <0.0001 | -              | <0.0001 | 0.2%                       | 0.08    |
| (After 2003)     |                           |         | 12.6%          |         |                            |         |
| PFHxA            | -                         | -       | -              | -       | -                          | -       |
| PFHpA            | -                         | -       | -              | -       | -                          | -       |
| PFOA             | -3.3%                     | 0.052   | -3.1%          | 0.07    | -0.3%                      | 0.30    |
| PFNA             | 6.6%                      | <0.0001 | 7.0%           | <0.0001 | -0.4%                      | 0.06    |
| PFDA             | 8.2%                      | <0.0001 | 8.3%           | <0.0001 | -0.2%                      | 0.28    |
| PFUnA            | 6.1%                      | <0.0001 | 6.2%           | <0.0001 | -0.06%                     | 0.66    |
| PFDoA            | 4.4%                      | <0.0001 | 4.4%           | <0.0001 | -0.009%                    | 0.95    |
| PFTrA            | 7.4%                      | 0.0003  | 7.5%           | 0.004   | 0.05%                      | 0.93    |
| PFTeA            | 9.8%                      | 0.67    | 9.8%           | 0.67    | -0.07%                     | 0.96    |



**Table S10.** Measured concentrations ( $\text{pg g}^{-1}$  wet weight) of FOSA in five European flying squid (*Todarodes sagittatus*) caught off the coast of the Faroe Islands in 2010.

| ID   | FOSA       |
|------|------------|
| S1   | 232        |
| S2   | 260        |
| S3   | 177        |
| S4   | 386        |
| S5   | 363        |
| Mean | <b>284</b> |

## References

1. Dam, M.; van Bavel, B.; Rigét, F.; Rotander, A.; Polder, A.; Auðunsson, G. A.; Bloch, D.; Víkingsson, G.; Mikkelsen, B.; Gabrielsen, G. W.; Sagerup, K. "New" POPs in marine mammals in Nordic Arctic and NE Atlantic areas during three decades; Nordic Council of Ministers: Copenhagen 2011.
2. Young, C. J.; Furdui, V. I.; Franklin, J.; Koerner, R. M.; Muir, D. C.; Mabury, S. A., Perfluorinated Acids in Arctic Snow: New Evidence for Atmospheric Formation. *Environ Sci Technol* **2007**, *41*, 3455-3461.
3. Bloch, D.; Heide-Jorgense, M. P.; Stefansson, E.; Mikkelsen, B.; Ofstad, L. H.; Dietz, R.; Andersen, L. W., Short-term movements of long-finned pilot whales *Globicephala melas* around the Faroe Islands. *Wildlife Biology* **2003**, *9* (1), 47-58.
4. Bloch, D.; Lockyer, C.; Zachariassen, M., Age and growth parameters of the long-finned pilot whale off the Faroe Islands. *Report of the International Whaling Commission* **1993**, (Special Issue 14), 163-207.
5. Grandjean, P.; Budtz-Jorgensen, E., Total imprecision of exposure biomarkers: implications for calculating exposure limits. *Am J Ind Med* **2007**, *50* (10), 712-9.
6. Muller, C. E.; Gerecke, A. C.; Bogdal, C.; Wang, Z.; Scheringer, M.; Hungerbuhler, K., Atmospheric fate of poly- and perfluorinated alkyl substances (PFASs): I. Day-night patterns of air concentrations in summer in Zurich, Switzerland. *Environ Pollut* **2012**, *169*, 196-203.
7. Vierke, L.; Ahrens, L.; Shoeib, M.; Palm, W. U.; Webster, E. M.; Ellis, D. A.; Ebinghaus, R.; Harner, T., In situ air-water and particle-water partitioning of perfluorocarboxylic acids, perfluorosulfonic acids and perfluorooctyl sulfonamide at a wastewater treatment plant. *Chemosphere* **2013**, *92* (8), 941-8.
8. EPA, U. *Estimation Programs Interface Suite™ for Microsoft® Windows, v 4.11*, United States Environmental Protection Agency: Washington, DC, USA, 2012.
9. Arnot, J. A.; Gobas, F., A food web bioaccumulation model for organic chemicals in aquatic ecosystems. *Environmental Toxicology and Chemistry* **2004**, *23* (10), 2343-2355.
10. Mortola, J. P.; Limoges, M. J., Resting breathing frequency in aquatic mammals: a comparative analysis with terrestrial species. *Respir Physiol Neurobiol* **2006**, *154* (3), 500-14.
11. Lafortuna, C. L.; Jahoda, M.; Azzellino, A.; Saibene, F.; Colombini, A., Locomotor behaviours and respiratory pattern of the Mediterranean fin whale (*Balaenoptera physalus*). *Eur J Appl Physiol* **2003**, *90* (3-4), 387-95.
12. Innes, S.; Lavigne, D. M.; Earle, W. M.; Kovacs, K. M., Feeding rates of seals and whales. *Journal of Animal Ecology* **1987**, *56*, 115-130.
13. Gobas, F. A. P. C.; Arnot, J. A., Food web bioaccumulation model for polychlorinated biphenyls in San Francisco Bay, California, USA. *Environmental Toxicology and Chemistry* **2010**, n/a-n/a.
14. Vestergren, R.; Cousins, I. T.; Trudel, D.; Wormuth, M.; Scheringer, M., Estimating the contribution of precursor compounds in consumer exposure to PFOS and PFOA. *Chemosphere* **2008**, *73* (10), 1617-24.
15. Gebbink, W. A.; Berger, U.; Cousins, I. T., Estimating human exposure to PFOS isomers and PFCA homologues: the relative importance of direct and indirect (precursor) exposure. *Environ Int* **2015**, *74*, 160-9.

16. Binnington, M. J.; Wania, F., Clarifying relationships between persistent organic pollutant concentrations and age in wildlife biomonitoring: individuals, cross-sections, and the roles of lifespan and sex. *Environ Toxicol Chem* **2014**, *33* (6), 1415-26.
